# Supplementary figures and images for: Prognostic Profiling of the EMT-Associated and Immunity-Related LncRNAs in Lung Squamous Cell Carcinomas
Source: MDPI journal article supplement (doi:10.3390/cells11182881), 2022-09-15

**A**

—●— GSE29013    —●— GSE30219  
—●— GSE37745    —●— GSE50081

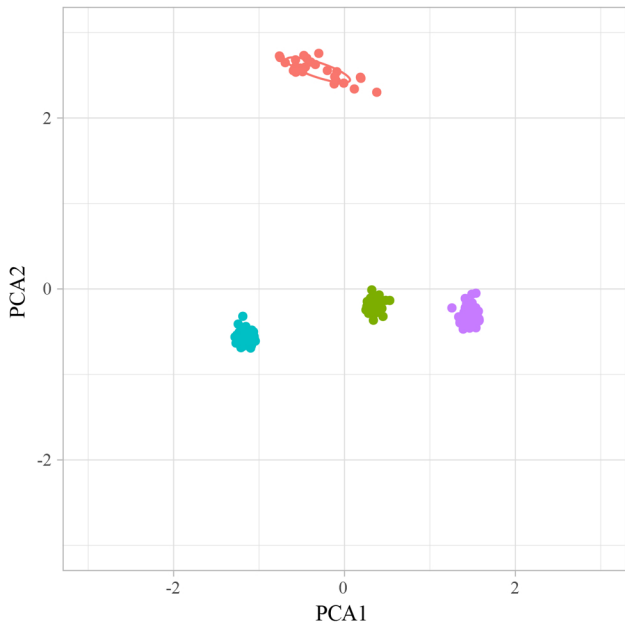**B**

—●— GSE29013    —●— GSE30219  
—●— GSE37745    —●— GSE50081

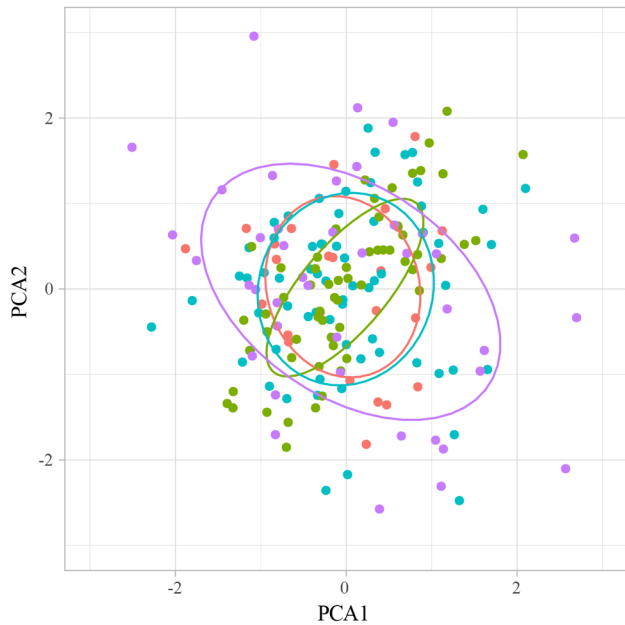

Supplement: s1 [file s1]

category C1 C2

**A**

TCGA

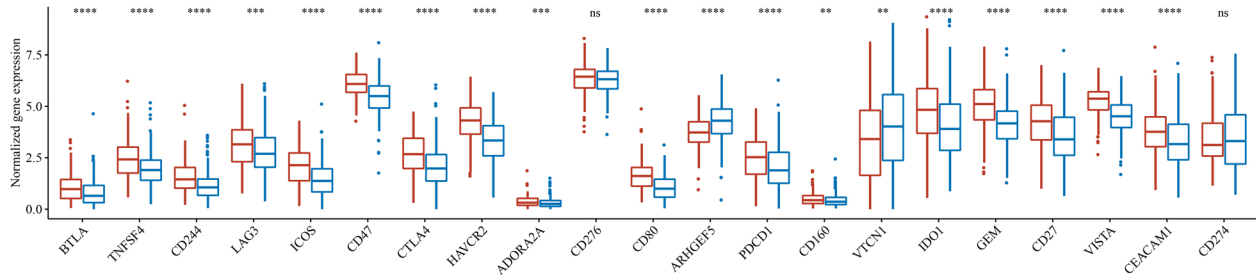**B**

GEO

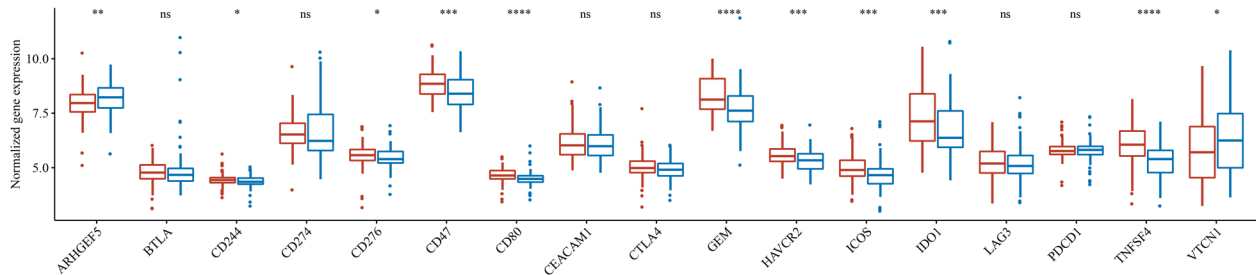

Supplement: s1 [file s1]

## GEO

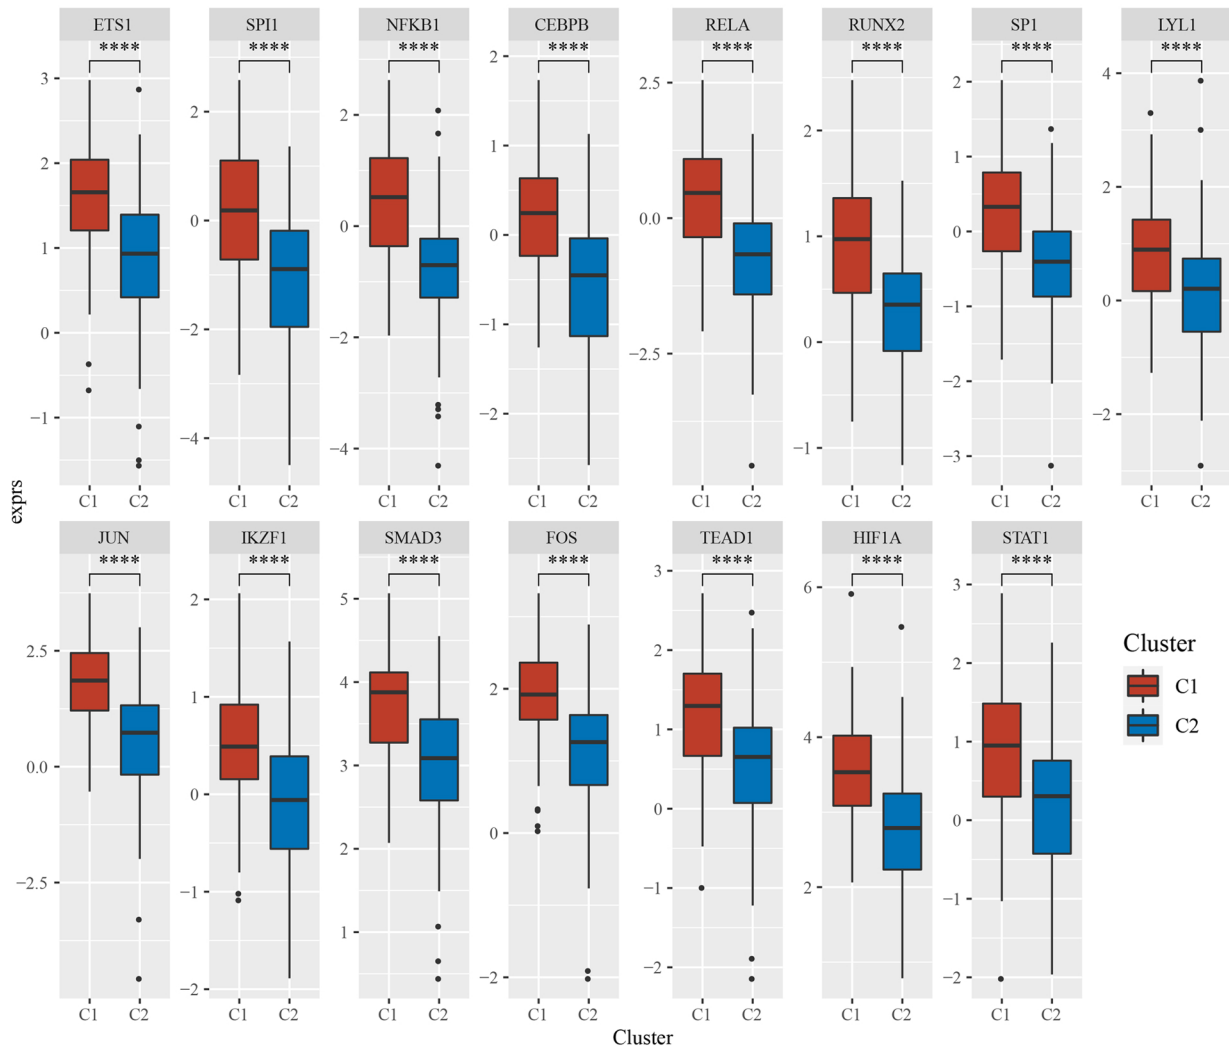

Supplement: s1 [file s1]
